# Supplementary material for: Factors associated with, and variations in, COVID-19 hospital death rates in England’s first two waves: observational study
Source: HighWire-hosted journal article supplement (doi:10.1136/bmjopen-2021-060251), 2022-06-01
Supplement: bmjopen-2021-060251supp001_data_supplement.pdf [file bmjopen-2021-060251supp001_data_supplement.pdf]

## Appendix

### Table of Contents

|                                                                                                                                                                                                      |           |
|------------------------------------------------------------------------------------------------------------------------------------------------------------------------------------------------------|-----------|
| <i>ICD10 codes for comorbidities</i> .....                                                                                                                                                           | <b>3</b>  |
| <i>How we modelled the hospital-level variables</i> .....                                                                                                                                            | <b>6</b>  |
| <i>Figure A1. Locally weighted smoothing (LOESS) plot of age against the log(odds) of death for 122 English hospitals from August 2020 to March 2021</i> .....                                       | <b>7</b>  |
| <i>Figure A2. LOESS plot of daily mean COVID-19 hospital admissions against the daily mean log(odds) of death for 122 English hospitals from August 2020 to March 2021</i> .....                     | <b>8</b>  |
| <i>Figure A3. LOESS plot of weekly mean bed occupancies against the weekly log(odds) of death for 122 English hospitals from August 2020 to March 2021</i> .....                                     | <b>9</b>  |
| <i>Figure A4. LOESS plot of weekly mean COVID-19 bed occupancies against the weekly log(odds) of death for 122 English hospitals from August 2020 to March 2021</i> .....                            | <b>10</b> |
| <i>Figure A5. LOESS plot of weekly mean COVID-19 occupied mechanically ventilated (MV) beds against the weekly log(odds) of death for 122 English hospitals from August 2020 to March 2021</i> ..... | <b>11</b> |
| <i>Figure A6. LOESS plot of weekly mean COVID-19 staff absences against the weekly log(odds) of death for English hospitals for 122 English hospitals from August 2020 to March 2021</i> .....       | <b>12</b> |
| <i>Figure A7: COVID-19 crude in-hospital mortality rates with 95% confidence intervals (CI) among 122 English hospitals by month of admission</i> .....                                              | <b>13</b> |
| <i>Figure A8: Calibration plot for the first wave two-level model (March to July 2020)</i> .....                                                                                                     | <b>14</b> |
| <i>Figure A9: Calibration plot for the second wave two-level model (August 20 to March 21)</i> .....                                                                                                 | <b>14</b> |
| <i>Figure A10: Funnel plot for crude COVID-19 mortality rate for 122 trusts in the first wave (March 2020 to July 2020)</i> .....                                                                    | <b>15</b> |
| <i>Figure A11: Funnel plot for crude COVID-19 mortality rate for 122 trusts in the second wave (August 2020 to March 2021)</i> .....                                                                 | <b>16</b> |
| <i>Figure A12: Funnel plot for adjusted COVID-19 standardised mortality ratio for 122 trusts in the first wave (March 2020 to July 2020)</i> .....                                                   | <b>17</b> |

|                                                                                                                                           |           |
|-------------------------------------------------------------------------------------------------------------------------------------------|-----------|
| <i>Table A1: Overall p-value for significance for all covariates in the first and second wave two-level models .....</i>                  | <b>18</b> |
| <i>Table A2: Average crude rates by age group for lowest- and highest-mortality hospital quartiles in the first and second wave .....</i> | <b>19</b> |
| <i>Sensitivity analysis results .....</i>                                                                                                 | <b>20</b> |

**ICD10 codes for comorbidities**

| Comorbidity            | ICD-10                                                                                                                                       |
|------------------------|----------------------------------------------------------------------------------------------------------------------------------------------|
| Dementia               | F00<br>F01<br>F02<br>F051                                                                                                                    |
| Coronary heart disease | I099<br>I110<br>I130<br>I132<br>I255<br>I420<br>I425<br>I426<br>I427<br>I428<br>I429<br>I43<br>I50<br>P290                                   |
| Hypertension           | I10<br>I11<br>I12<br>I13<br>I15                                                                                                              |
| COPD                   | I278<br>I279<br>J40<br>J41<br>J42<br>J43<br>J44<br>J45<br>J46<br>J47<br>J60<br>J61<br>J62<br>J63<br>J64<br>J65<br>J66<br>J67<br>J684<br>J701 |

|          |      |
|----------|------|
|          | J703 |
| Diabetes | E100 |
|          | E101 |
|          | E102 |
|          | E103 |
|          | E104 |
|          | E105 |
|          | E106 |
|          | E107 |
|          | E108 |
|          | E109 |
|          | E110 |
|          | E111 |
|          | E112 |
|          | E113 |
|          | E114 |
|          | E115 |
|          | E116 |
|          | E117 |
|          | E118 |
|          | E119 |
|          | E120 |
|          | E121 |
|          | E122 |
|          | E123 |
|          | E124 |
|          | E125 |
|          | E126 |
|          | E127 |
|          | E128 |
|          | E129 |
|          | E130 |
|          | E131 |
|          | E132 |
|          | E133 |
|          | E134 |
|          | E135 |
|          | E136 |
|          | E137 |
|          | E138 |
|          | E139 |
|          | E140 |
|          | E141 |
|          | E142 |
|          | E143 |
|          | E144 |

|        |                                                                                                                                                                                                                   |
|--------|-------------------------------------------------------------------------------------------------------------------------------------------------------------------------------------------------------------------|
|        | E145<br>E146<br>E147<br>E148<br>E149                                                                                                                                                                              |
| Renal  | I120<br>I131<br>N18<br>N19<br>N250<br>Z490<br>Z491<br>Z492<br>Z940<br>Z992                                                                                                                                        |
| Cancer | C0<br>C1<br>C20<br>C21<br>C22<br>C23<br>C24<br>C25<br>C26<br>C30<br>C31<br>C32<br>C33<br>C34<br>C37<br>C38<br>C39<br>C40<br>C41<br>C43<br>C45<br>C46<br>C47<br>C48<br>C49<br>C5<br>C6<br>C70<br>C71<br>C72<br>C73 |

|         |      |
|---------|------|
|         | C74  |
|         | C75  |
|         | C76  |
|         | C77  |
|         | C78  |
|         | C79  |
|         | C80  |
|         | C81  |
|         | C82  |
|         | C83  |
|         | C84  |
|         | C85  |
|         | C88  |
|         | C900 |
|         | C902 |
|         | C96  |
|         | C97  |
| Obesity | E66  |

#### How we modelled the hospital-level variables

We plotted continuous variables against the outcome to check for linearity and applied linear splines with 1 knot as described below. For the final model, if the odds ratios were not different from 1 to two decimal places and  $p > 0.05$ , the spline was replaced with a simpler linear term.

**Figure A1. Locally weighted smoothing (LOESS) plot of age against the log(odds) of death for 122 English hospitals from August 2020 to March 2021**

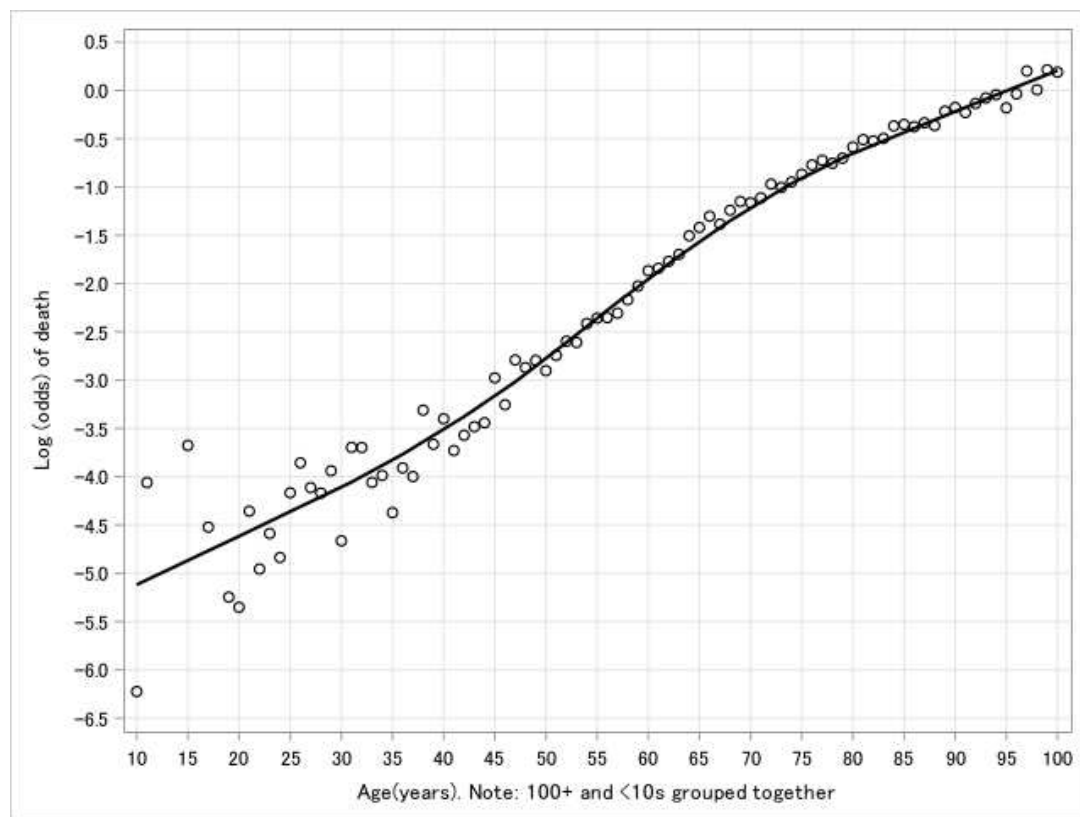

A linear term only and an addition of a quadratic term was trialled. The quadratic age term improved the model fit.

**Figure A2. LOESS plot of daily mean COVID-19 hospital admissions against the daily mean log(odds) of death for 122 English hospitals from August 2020 to March 2021**

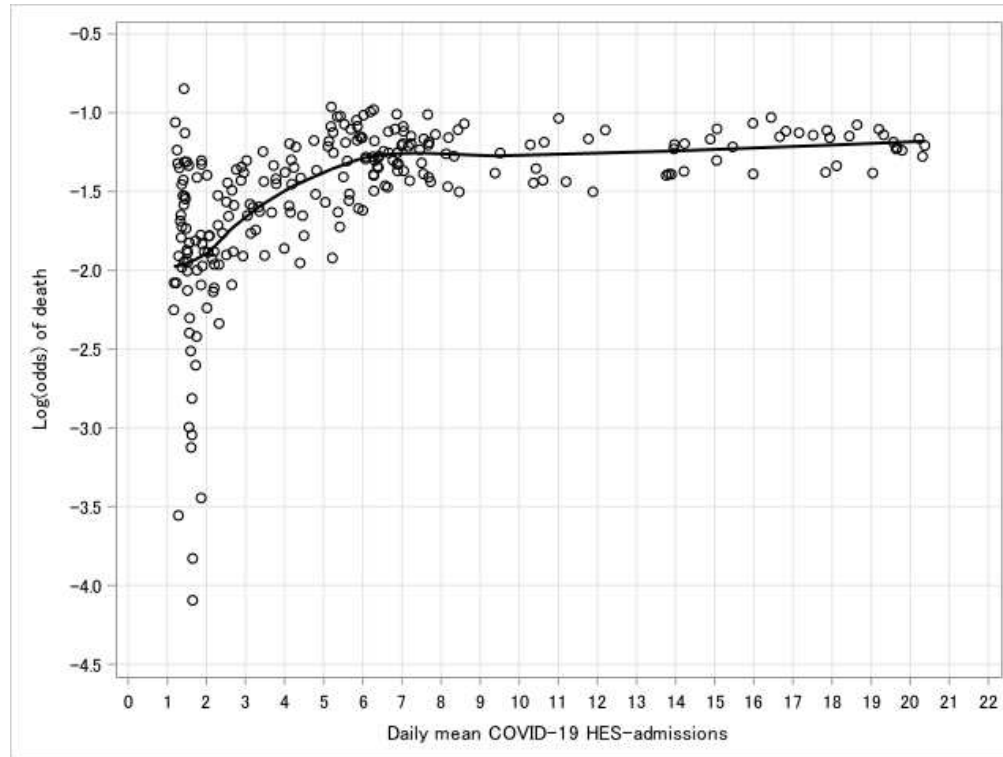

We tried this as linear and as a spline with a knot at 6. With the knot, the odds ratio was very small and  $p < 0.05$ . The fit was approximated best as linear.



**Figure A3. LOESS plot of weekly mean bed occupancies against the weekly log(odds) of death for 122 English hospitals from August 2020 to March 2021**

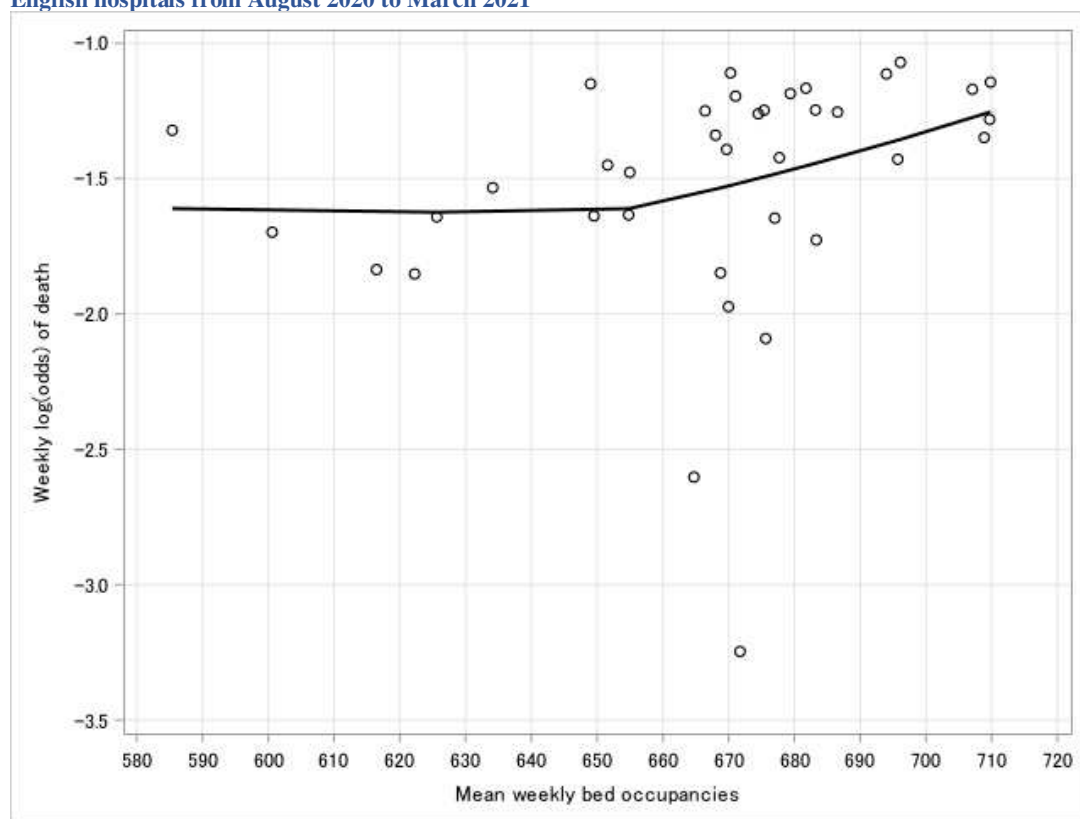

Tried a knot at 655 and as linear. Better fit with the knot at 655 but odds ratio was very small and  $p < 0.05$  so the final model was run with a linear term.

Figure A4. LOESS plot of weekly mean COVID-19 bed occupancies against the weekly log(odds) of death for 122 English hospitals from August 2020 to March 2021

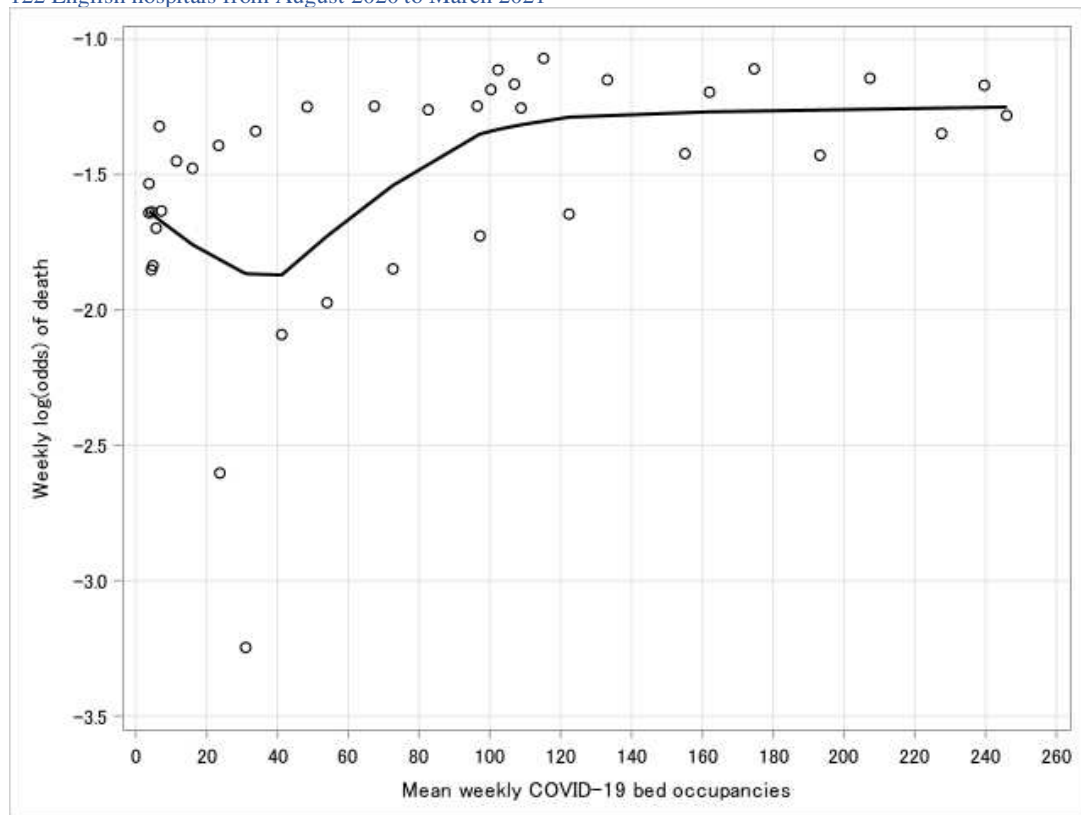

Tried a linear term, a knot at 40 and a knot at 100. The fit was best as linear term.

**Figure A5. LOESS plot of weekly mean COVID-19 occupied mechanically ventilated (MV) beds against the weekly log(odds) of death for 122 English hospitals from August 2020 to March 2021**

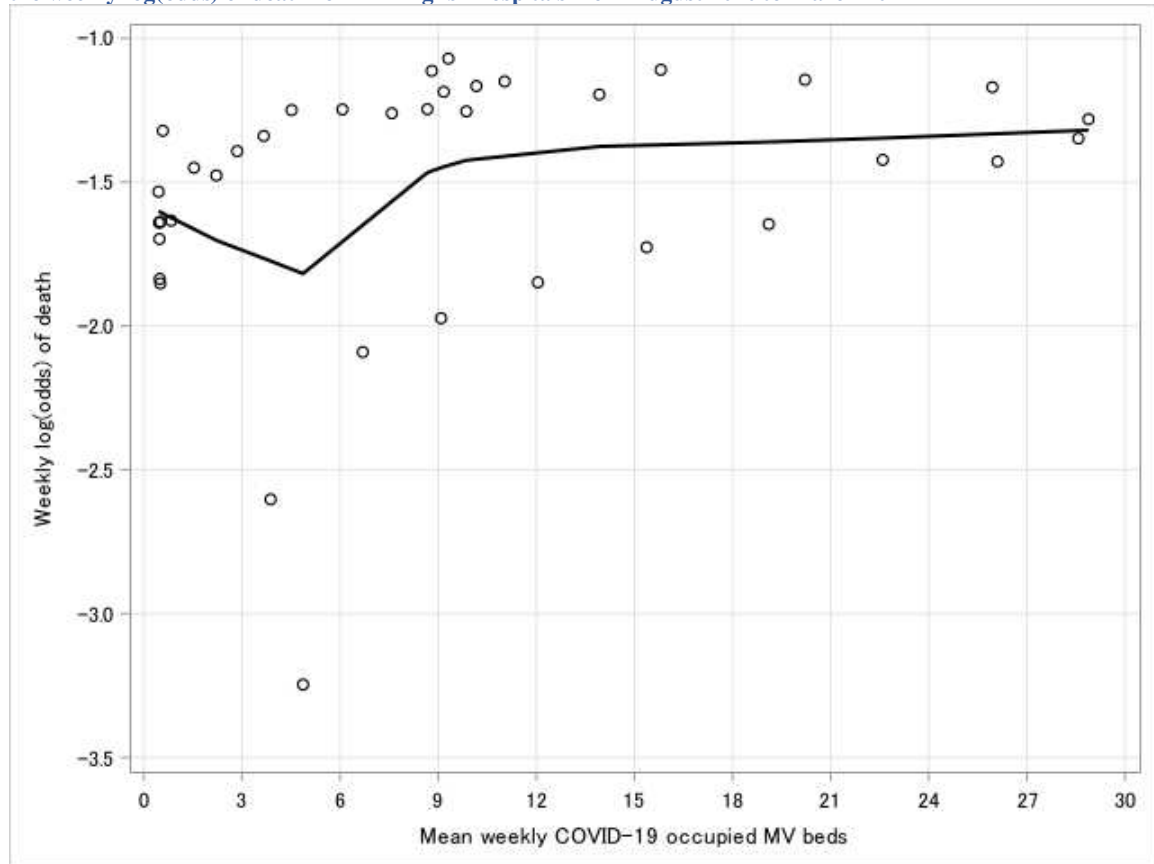

Tried a linear term, a knot at 5 and a knot at 8. The fit was best as linear

**Figure A6. LOESS plot of weekly mean COVID-19 staff absences against the weekly log(odds) of death for English hospitals for 122 English hospitals from August 2020 to March 2021**

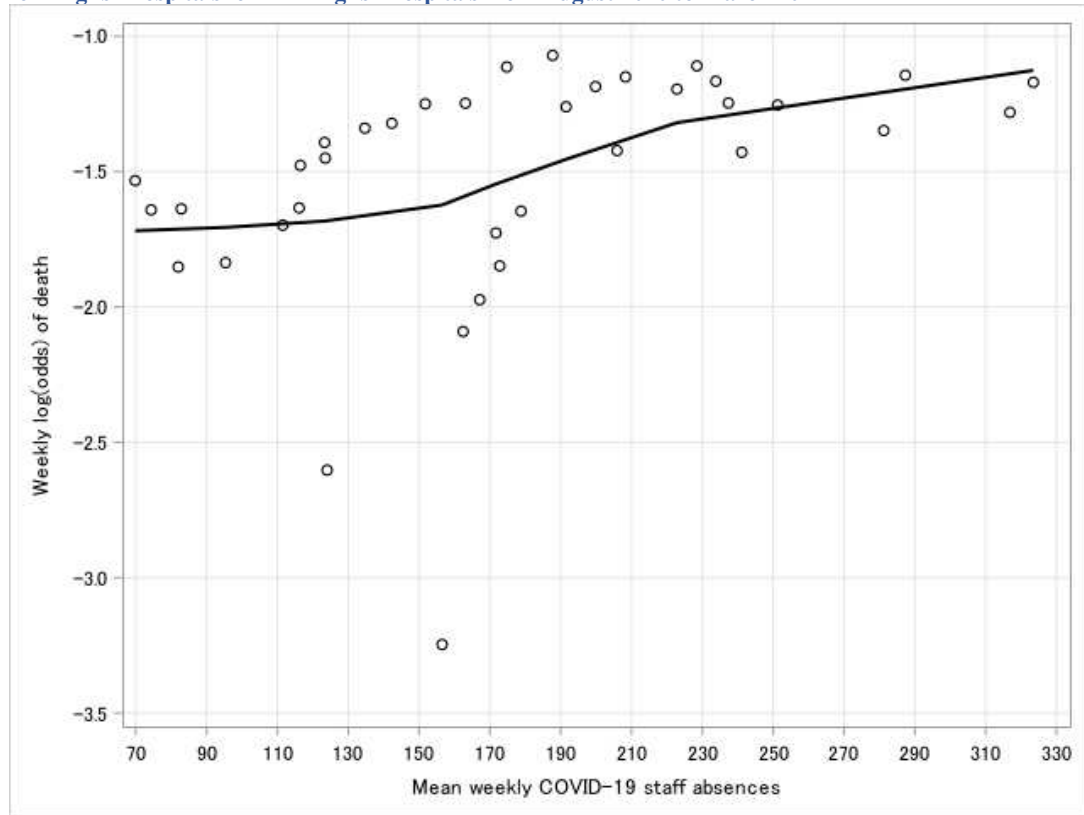

Tried a linear term and a knot at 160. The fit was best as linear.

**Figure A7: COVID-19 crude in-hospital mortality rates with 95% confidence intervals (CI) among 122 English hospitals by month of admission**

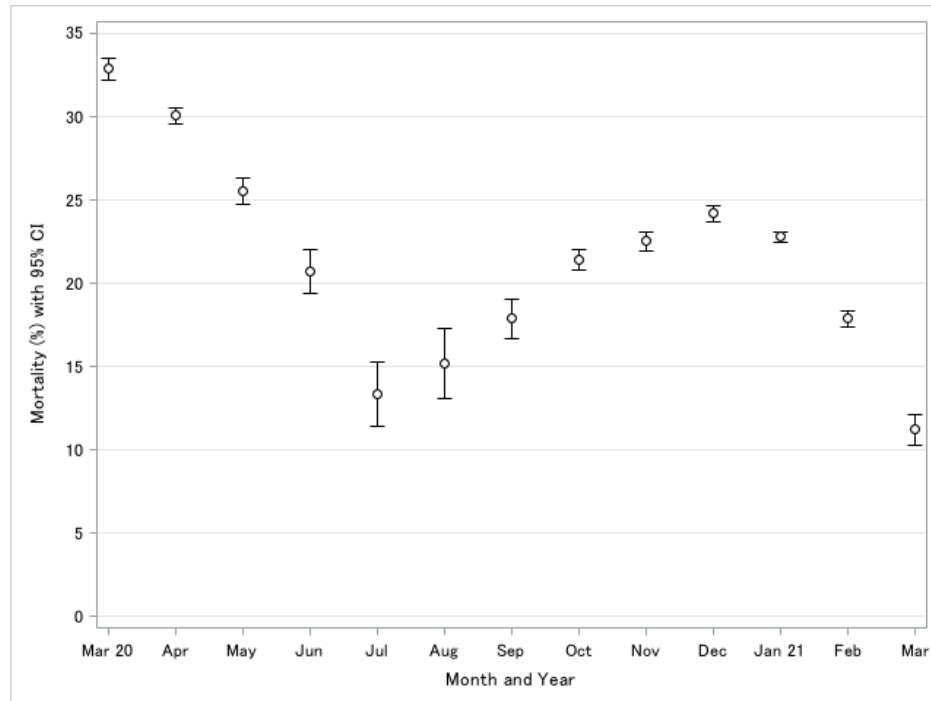

**Figure A8: Calibration plot for the first wave two-level model (March to July 2020)**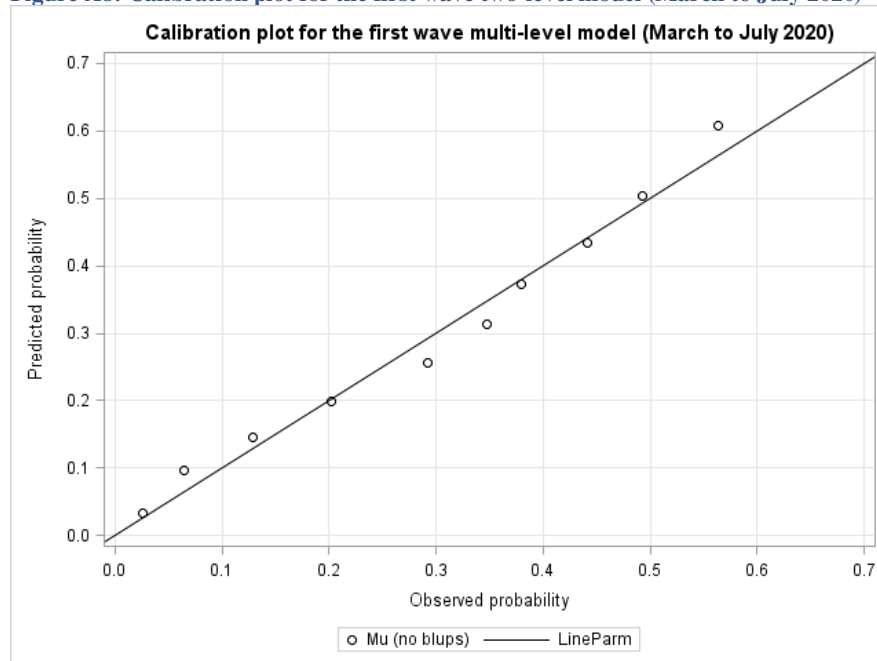**Figure A9: Calibration plot for the second wave two-level model (August 20 to March 21)**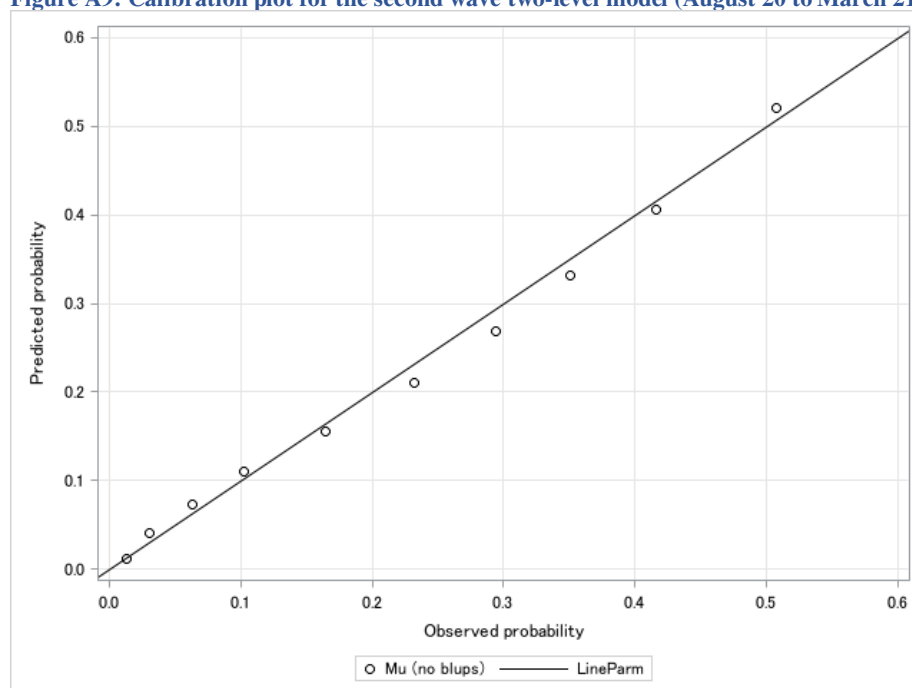

Figure A10: Funnel plot for crude COVID-19 mortality rate for 122 trusts in the first wave (March 2020 to July 2020)

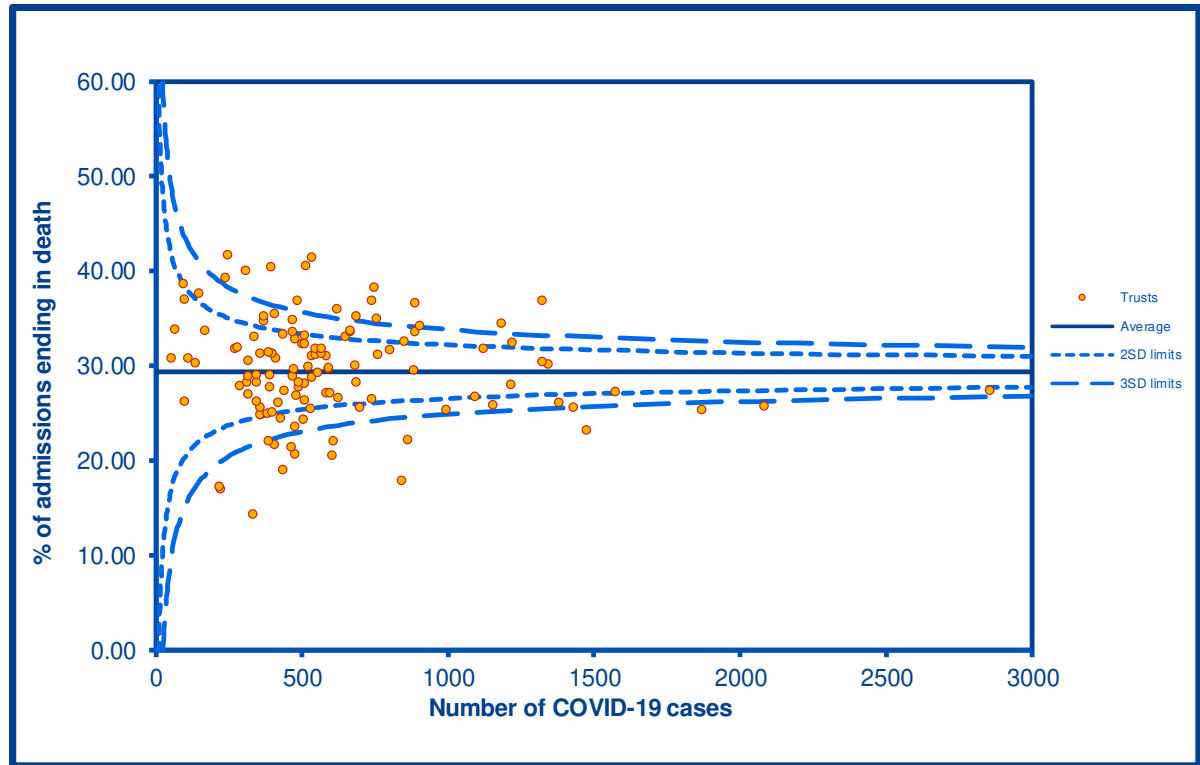

Figure A11: Funnel plot for crude COVID-19 mortality rate for 122 trusts in the second wave (August 2020 to March 2021)

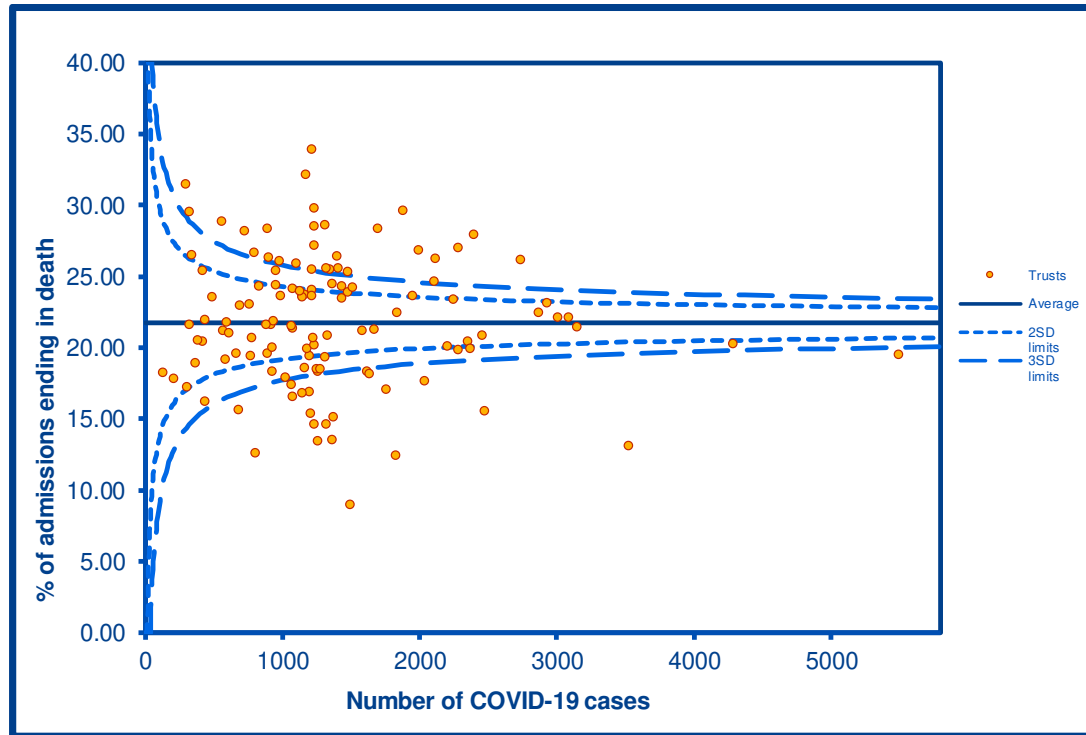



Figure A12: Funnel plot for adjusted COVID-19 standardised mortality ratio for 122 trusts in the first wave (March 2020 to July 2020)

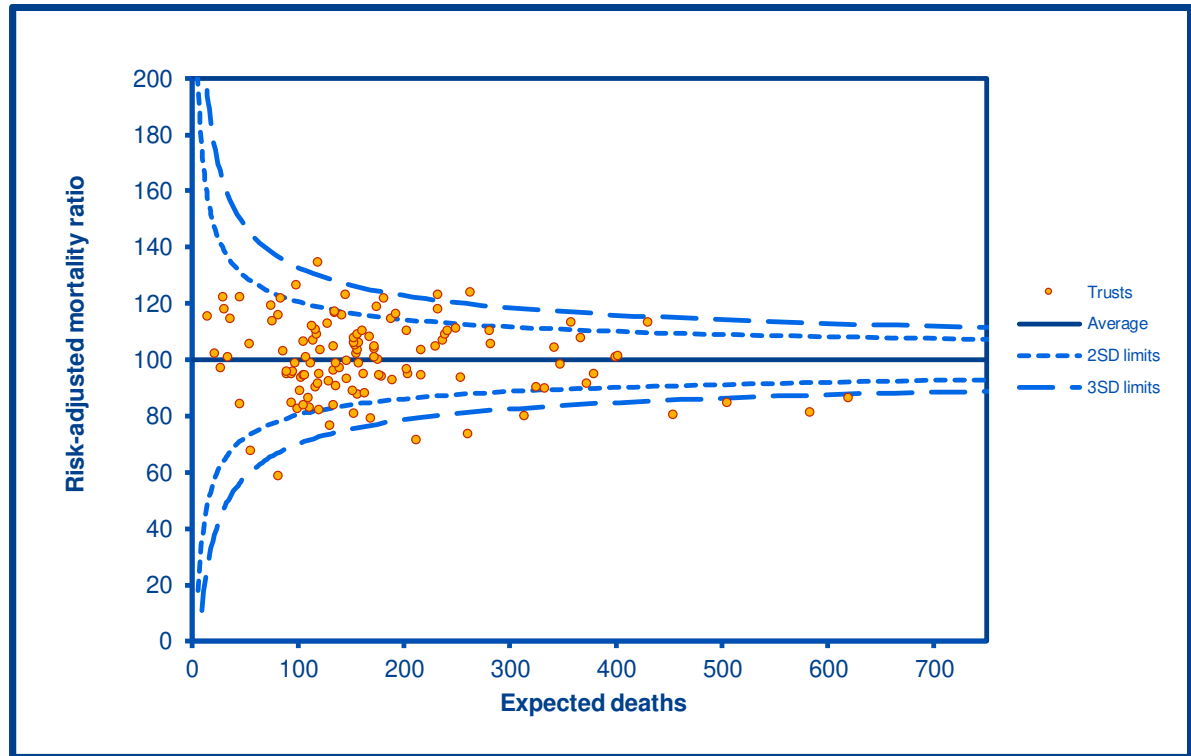

**Table A1: Overall p-value for significance for all covariates in the first and second wave two-level models**

| Feature                                    | Overall p-values                   |                                            |
|--------------------------------------------|------------------------------------|--------------------------------------------|
|                                            | First wave<br>(March to July 2020) | Second wave<br>(August 2020 to March 2021) |
| Age                                        | -                                  | <0.0001*                                   |
| Age squared                                | -                                  | <0.0001*                                   |
| <45 years (spline)                         | <0.0001*                           | -                                          |
| 45+ years (spline)                         | <0.0001*                           | -                                          |
| Gender                                     | <0.0001*                           | <0.0001*                                   |
| Ethnic group                               | <0.0001*                           | <0.0001*                                   |
| Deprivation quintile                       | <0.0005*                           | <0.0001*                                   |
| Method of admission                        | 0.0035*                            | 0.0045*                                    |
| Admission source                           | <0.0001*                           | <0.0001*                                   |
| Emergency admissions in previous 12 months | <0.0001*                           | <0.0001*                                   |
| Admission month                            | <0.0001*                           | <0.0001*                                   |
| Diabetes                                   | <0.0001*                           | <0.0001*                                   |
| Hypertension                               | <0.0001*                           | <0.0001*                                   |
| Coronary heart disease                     | <0.0001*                           | <0.0001*                                   |
| COPD                                       | 0.0129*                            | <0.0001*                                   |
| Obesity                                    | <0.0001*                           | <0.0001*                                   |
| Cancer                                     | <0.0001*                           | <0.0001*                                   |
| Renal disease                              | <0.0001*                           | <0.0001*                                   |
| Dementia                                   | <0.0001*                           | <0.0001*                                   |
| COVID19 daily admissions                   | -                                  | 0.0047*                                    |
| <4 admissions                              | 0.2500                             | -                                          |
| 4+ admissions                              | 0.4425                             | -                                          |
| Bed occupancy                              | 0.1849                             | 0.1077                                     |
| COVID19 bed occupancy                      | 0.1507                             | <0.0001*                                   |
| COVID19 MV bed occupancy                   | -                                  | <0.0001*                                   |
| <4 beds                                    | 0.5867                             | -                                          |
| 4+ beds                                    | 0.4861                             | -                                          |
| COVID19 related staff absences             | 0.9398                             | 0.6952                                     |

\*statistically significant

**Table A2: Average crude rates by age group for lowest- and highest-mortality hospital quartiles in the first and second wave**

| Lowest quartile |                         |           |                | Highest quartile |                         |           |                |                       |
|-----------------|-------------------------|-----------|----------------|------------------|-------------------------|-----------|----------------|-----------------------|
| First wave      |                         |           |                | First wave       |                         |           |                |                       |
| Age             | Crude rate (% , 95% CI) | OR cf <50 | OR cf prev age | Age              | Crude rate (% , 95% CI) | OR cf <50 | OR cf prev age | OR cf lowest quartile |
| <50             | 3.5 (3.0 to 4.0)        | 1         | 1              | <50              | 6.5 (5.4 to 7.5)        | 1         | 1              | 1.92                  |
| 50-59           | 11.3 (10.3 to 12.4)     | 3.5       | 3.5            | 50-59            | 17.8 (16.1 to 19.4)     | 3.1       | 3.1            | 1.70                  |
| 60-69           | 21.4 (20.1 to 22.7)     | 7.5       | 2.1            | 60-69            | 30.7 (28.8 to 32.6)     | 6.4       | 2.0            | 1.63                  |
| 70-79           | 32.8 (31.5 to 34.2)     | 13.5      | 1.8            | 70-79            | 41.9 (40.2 to 43.7)     | 10.4      | 1.6            | 1.48                  |
| 80-89           | 40.7 (39.3 to 42.0)     | 18.9      | 1.4            | 80-89            | 50.3 (48.7 to 51.9)     | 14.6      | 1.4            | 1.47                  |
| 90+             | 44.9 (42.7 to 47.2)     | 22.5      | 1.2            | 90+              | 55.8 (53.2 to 58.4)     | 18.2      | 1.2            | 1.55                  |
| Second wave     |                         |           |                | Second wave      |                         |           |                |                       |
| Age             | Crude rate (% , 95% CI) | OR cf <50 | OR cf prev age | Age              | Crude rate (% , 95% CI) | OR cf <50 | OR cf prev age | OR cf lowest quartile |
| <50             | 1.6 (1.3 to 1.9)        | 1         | 1              | <50              | 4.2 (3.7 to 4.6)        | 1         | 1              | 2.70                  |
| 50-59           | 5.4 (4.8 to 5.9)        | 3.5       | 3.5            | 50-59            | 10.7 (9.9 to 11.5)      | 2.7       | 2.5            | 2.10                  |
| 60-69           | 12.5 (11.7 to 13.4)     | 8.8       | 2.5            | 60-69            | 22.3 (21.4 to 23.3)     | 6.5       | 2.1            | 2.01                  |
| 70-79           | 23.0 (22.0 to 24.0)     | 18.4      | 2.1            | 70-79            | 34.2 (33.2 to 35.2)     | 11.9      | 1.5            | 1.74                  |
| 80-89           | 33.2 (32.1 to 34.4)     | 30.6      | 1.7            | 80-89            | 44.9 (43.8 to 45.9)     | 18.6      | 1.3            | 1.64                  |
| 90+             | 40.5 (38.5 to 42.5)     | 41.9      | 1.4            | 90+              | 52.3 (50.5 to 54.1)     | 25.0      | 1.2            | 1.61                  |

Cf, compared with; OR = odds ratio

### Sensitivity analysis results

There were 393,711 admissions with COVID-19 in any diagnosis position, with 272,293 in the first wave and 121,418 admissions in the second wave. Where it occurred in a secondary position for the second wave, 35.7% of the time, the first one was occupied by a wide range of conditions, most commonly ICD-10 N390 (urinary tract infection, site not specified, 1.3%), A419 (unspecified sepsis, 1.0%), R296 (tendency to fall, not elsewhere classified, 0.9%), N179 (unspecified acute renal failure, 0.8%) and S720 (fracture of neck of femur, 0.8%).

Hospital SMRs for the adjusted sensitivity model for COVID-19 in any diagnosis code during admission ranged from 66 to 127, with 19.7% high and 18.9% low mortality outliers at 2SD and 6.6% high and 9.8% low mortality outliers at 3SD on the funnel plots for the second wave. For the second wave main analysis given earlier, hospital SMRs for the adjusted model ranged from 52 to 135, with 22.1% high and 13.9% low mortality outliers at 2SD and 9.0% high and 12.3% low mortality outliers at 3SD on the funnel plots. Correlation with the SMRs derived from COVID-19 as the primary diagnosis was high at 0.87 ( $p < 0.0001$ ) for the second wave.

When we restricted admissions to only confirmed cases (U071), there were 158,231 admissions in the second wave. The adjusted hospital SMR sensitivity model ranged from 52 to 133, with 21.3% high and 13.9% low mortality outliers using 95% control limits and 9.8% high and 11.5% low mortality outliers using 99.8% limits for the second wave. Correlation with the SMRs derived from the main analysis was very high at 0.99 ( $p < 0.0001$ ) for the second wave.
